# Supplementary material
Source: publisher figshare collection journal article supplement (https://brill.figshare.com/articles/dataset/_/12860930)
Supplement: Supplementary file 1 [file 1]

## ELECTRONIC SUPPLEMENTARY MATERIALS

**Figure A1: Time spent by the demonstrator males near the central container**

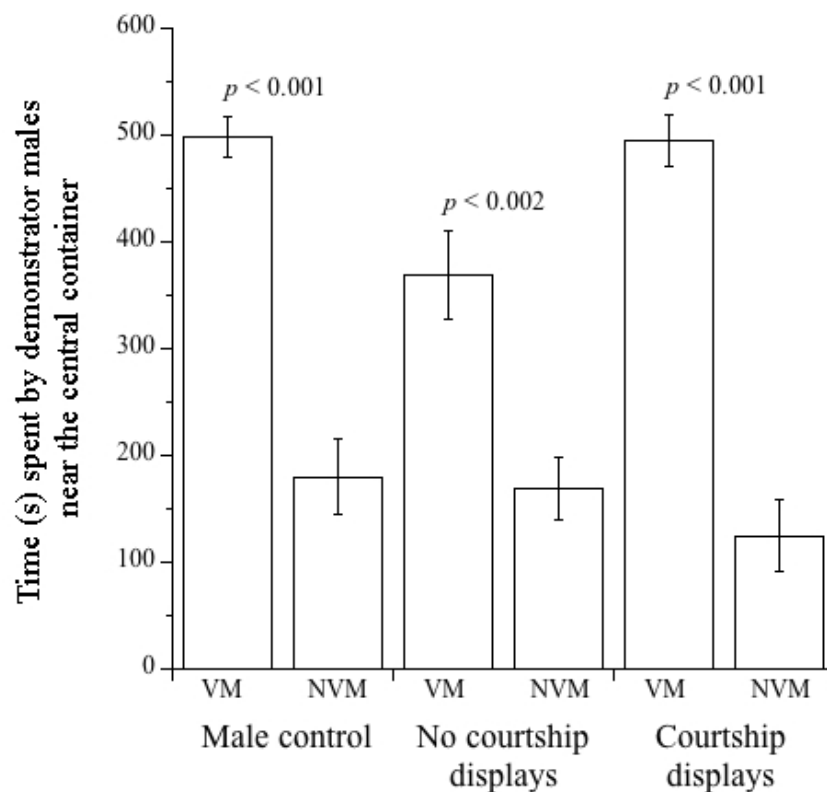

**Figure A1.** Mean  $\pm$  SE time (s) that the paired viewing (VM) and non-viewing (NVM) demonstrator male guppies spent within 5 cm of the central container, housing either a conspecific female or male depending on the treatment, in the experimental apparatus (see Figure 1a) during the Viewing Phase for each of the three treatments of the experiment. The treatment sample sizes for this particular dependent variable are Male control ( $N = 17$ ), No courtship displays ( $N = 14$ ), and Courtship displays ( $N = 11$ ). The  $p$  values shown above the bars compare the mean values for paired VM and NVM demonstrator males and were obtained using the paired  $t$ -test. See ESM 2 for the original data.
